1 **Title: Lifeless *Clostridia* stimulate methanogenesis on Fe<sup>0</sup> in an urban**  
2 **lake corrosive community**

3 **Authors:** Paola Andrea Palacios<sup>1</sup> and Amelia-Elena Rotaru<sup>1\*</sup>

4 **Affiliation:** <sup>1</sup>Nordcee, University of Southern Denmark, Odense, Denmark

5 \* **Correspondence:** [arotaru@biology.sdu.dk](mailto:arotaru@biology.sdu.dk)

6 **Running title:** Lifeless *Clostridia* stimulate methanogenesis on Fe<sup>0</sup>

7 **Keywords:** microbial influenced corrosion; iron corrosion; Fe<sup>0</sup>; *Clostridium*; acetogen; acetogenesis; [FeFe]-  
8 hydrogenases; *Methanosarcina*; *Methanotherix/Methanosaeta*; *Methanothermobacter*; methanogen;  
9 methanogenesis

## 10 Abstract

11 Urban environments are webbed with iron-steel structures above and belowground. Underground, in non-  
12 sulfidic environments, it has been suggested that interspecies interactions cause Fe<sup>0</sup> corrosion. Particularly,  
13 *Methanosarcinales* were assumed to interact syntrophically with acetogenic bacteria during Fe<sup>0</sup> corrosion.  
14 Here we challenge this assumption and show that a community of methanogens (38% *Methanosarcinales*)  
15 prospers on Fe<sup>0</sup> especially after the demise of the acetogens. Acetogens were mainly represented by  
16 *Clostridium* (81% of *Bacteria*). Methanogens were however more diverse including *Methanosarcina* (22% of  
17 *Archaea*), *Methanosaeta* (17% of *Archaea*) and *Methanothermobacter* (22% of *Archaea*) as key groups.  
18 Surprisingly, acetogens started using electrons from Fe<sup>0</sup> immediately, unchallenged by competing  
19 methanogens. Acetogens were expected to be outcompeted by energy efficient methanogens with  
20 comparatively lower H<sub>2</sub>-uptake thresholds. However, acetogens prevailed, perhaps because in contrast to  
21 methanogens they contain [FeFe]-hydrogenases (encoded in the lake-*Clostridia* metagenome). [FeFe]-  
22 hydrogenases from *Clostridium* were previously shown effective at retrieving electrons from Fe<sup>0</sup> for proton  
23 reduction. When acetogens thrived, methanogenic rates were low (25.2±8 μM/day) but increased appreciably  
24 (62.5±5 μM/day) when acetogens collapsed. Acetate could not explain more than a third of the observed  
25 methanogenic rates. The remaining methane could be explained by methanogens reducing their energy  
26 expenses while exploiting *Clostridium* remains such as readily fixed nitrogen and/or exuded [FeFe]-  
27 hydrogenases producing H<sub>2</sub> on Fe<sup>0</sup>. This has implications on our understanding of viable interactions between  
28 autotrophic species retrieving electrons from Fe<sup>0</sup> or other insoluble electron donors.

## 29 Implications

30 Corrosion damages to underground iron-structures distress both the local environment and the economy. Here  
31 we studied an urban lake community corroding Fe<sup>0</sup>. The corrosive community was dominated by *Clostridium*  
32 and *Methanosarcinales*, which sequentially produced first more acetate and later methane. Here we bring  
33 evidence for an unusual interaction mechanism on Fe<sup>0</sup>, showing that methanogenesis is enhanced by inactive  
34 acetogens. Alone, the *Clostridium*-acetogens discovered in this study, could retrieve electrons from Fe<sup>0</sup>  
35 effectively, which makes them a good candidate for electrosynthesis of fossil-fuels' alternatives - a future  
36 biotechnological application.

## 37 INTRODUCTION

38 Steel infrastructure extends for billions of kilometers below ground enabling transport and storage of clean  
39 water, chemicals, fuels, sewage, but also protection for telecommunication and electricity cables. Deep  
40 underground, under anoxic, non-sulfidic conditions, steel was expected to persist unharmed for centuries (1-  
41 3). And yet, under such conditions, certain groups of anaerobes (methanogens and acetogens) strip electrons  
42 off Fe<sup>0</sup> leading to microbial induced corrosion (MIC) (4-8). Damages induced by MIC in the underground are  
43 often discovered too late, leading to environmental and economic devastation. Thus, it is important to be able  
44 to predict the lifespan of the material if exposed to microbial communities native to the site where steel  
45 structures are located. This would lead to effective replacement strategies and recuperation of the metal prior  
46 to accidental spills that may be detrimental to the surrounding environment (1-3).

47 MIC in non-sulfidic environments is often linked to the presence of acetogens like *Clostridium* and  
48 methanogens like *Methanosarcinales* on the surface of the corroded steel structure (4-9). It has been suggested  
49 that *Methanosarcinales* were growing in a mutualistic relationship with the acetogens, and allegedly both  
50 groups were gaining from the interaction (7, 8). This assumption was based on acetogens producing acetate,  
51 which would be then consumed by acetotrophic *Methanosarcinales* methanogens. Concurrently, acetogens  
52 were expected to be favored by the removal of their metabolic product - acetate. However, apart from  
53 establishing a mutualistic interaction on Fe<sup>0</sup>, acetogens and methanogens may be interacting in two other ways:  
54 1) by competing and 2) by establishing a succession to maximize access to electrons from Fe<sup>0</sup> for reduction of  
55 CO<sub>2</sub> to acetate (acetogens; reaction 1) or methane (methanogens; reaction 2).

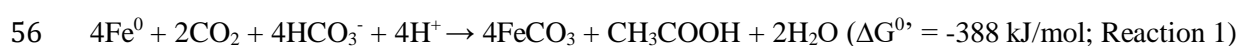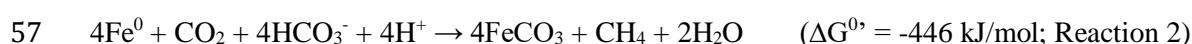

58 Theoretically, under standard thermodynamic conditions, methanogens should have an advantage over  
59 acetogens when provided with Fe<sup>0</sup> as sole electron donor (Reactions 1 & 2). Especially, since methanogens,  
60 unlike acetogens, are more effective at retrieving abiotic H<sub>2</sub> (formed on Fe<sup>0</sup>) due to their low H<sub>2</sub>-uptake  
61 thresholds (10, 11). Several groups of methanogens could corrode Fe<sup>0</sup> independent of acetogenic bacteria,  
62 including species of *Methanosarcina* (12-14), *Methanobacterium* (14-16) and *Methanococcus* (6, 13, 14, 17).  
63 The mechanism by which methanogens corrode Fe<sup>0</sup>, has been debated and includes reports which suggest they  
64 retrieve abiotic-H<sub>2</sub> off the Fe<sup>0</sup> surface (12), retrieve electrons directly using an unknown electron-uptake  
65 mechanism (15, 18) or use extracellular enzymes, which stimulate enzymatic H<sub>2</sub>-evolution on the Fe<sup>0</sup>-surface  
66 (17). The later mechanism was especially relevant for *Methanococcus* species which harbored an unstable

67 genomic island encoding [NiFe]-hydrogenases and formate dehydrogenases enzymes additional to those  
68 already encoded by their standard genome (19).

69 And yet, oftentimes acetogens dominate corrosive communities, outcompeting methanogens when  
70 concentrations of H<sub>2</sub> are high and temperatures are low, presumably due to the higher kinetics (V<sub>max</sub>) of their  
71 hydrogenases (10). Moreover, unlike methanogens, acetogens contain [FeFe]-hydrogenases (20), which could  
72 retrieve electrons directly from Fe<sup>0</sup> for proton reduction to H<sub>2</sub> possibly (21-23).

73 In this study, we were interested to understand the dynamics of acetogens and methanogens in an urban area  
74 where pipelines for infrastructure are buried underground. We studied corrosion of Fe<sup>0</sup> by an urban lake  
75 community from nearby a construction site, on the island of Fyn, Denmark. Alike our previous findings in a  
76 coastal-sea environment (24), the corroding microbial community was dominated by *Clostridium* and  
77 *Methanosarcinales*. We used a combination of physiological experiments, process inhibition and whole  
78 metagenomic analyses to study the interactions of acetogens and methanogens during Fe<sup>0</sup> corrosion. In contrast  
79 to our previous report on a corrosive coastal community (24), the acetogens and methanogens in this lake did  
80 not compete for retrieval of electrons from Fe<sup>0</sup>, instead methanogens appeared to take advantage of metabolites  
81 and enzymes released by lifeless acetogens.

## 82 **RESULTS AND DISCUSSION**

83 Methanogens, attached to corroded structures, were assumed to be indirectly involved in corrosion of Fe<sup>0</sup> (7,  
84 8). Here we show that methanogens from an urban lake may corrode Fe<sup>0</sup> alone, as effectively as a complex  
85 community of acetogens and methanogens together. However, within a complex community methanogenesis  
86 was stimulated by deactivated, but abundant co-occurring *Clostridium*. We therefore propose an unusual  
87 interaction, where methanogens may take advantage of acetogenic proton-reducing enzymes, which are set  
88 free during the collapse of the acetogenic community.

### 89 **Corrosion under electron acceptor limited conditions**

90 From the anoxic sediments of an urban lake near the university of Southern Denmark (**Fig. 1**), we enriched a  
91 methanogenic community for four successive transfers, strictly using Fe<sup>0</sup> as electron donor and CO<sub>2</sub> as sole  
92 electron acceptor. Under these conditions, the community was highly corrosive as confirmed by gravimetric  
93 and product accumulation analyses. Thus, the community utilized  $9.5 \pm 0.6$  mg Fe<sup>0</sup>, and induced 41% more  
94 weight loss than cell-free controls ( $6.7 \pm 0.05$  mg Fe<sup>0</sup>; n=3; p=0.01) (**Fig. 2**). Since CO<sub>2</sub> is the only electron  
95 acceptor available, two metabolisms are possible: methane production via CO<sub>2</sub>-reductive methanogenesis  
96 (reaction 3) and acetate production via acetogenesis (reaction 4).

97  $\text{CO}_2 + 8\text{e}^- + 8\text{H}^+ \rightarrow \text{CH}_4 + 2\text{H}_2\text{O}$  (reaction 3)

98  $2\text{CO}_2 + 8\text{e}^- + 8\text{H}^+ \rightarrow \text{CH}_3\text{COOH} + 2\text{H}_2\text{O}$  (reaction 4)

99 We determined if either of these processes, methanogenesis or acetogenesis, could be corrosive in isolation.  
100 Bacteria (acetogens) were inhibited with a cocktail of antibiotics (kanamycin and ampicillin), in order to favor  
101 only methanogens. Alone, methanogens were as corrosive ( $9.1 \pm 0.4$  mg  $\text{Fe}^0$ ) as the whole community ( $n=3$ ,  
102  $p=0.35$ ) (**Fig. 2**). Methanogens were inhibited with 2-bromoethanesulfonate (a coenzyme A analogue) in order  
103 to favor only acetogens. To our surprise acetogens were significantly more corrosive alone ( $10.6 \pm 0.4$  mg  $\text{Fe}^0$ ;  
104  $n=3$ ;  $p=0.04$ ) than within a mixed community (**Fig. 2**).

105 To better understand how methanogens and acetogens corroded  $\text{Fe}^0$  we corroborated gravimetric  
106 determinations with electron recoveries in metabolic products and functional metagenomics of the corrosive  
107 community.

#### 108 **Electron recoveries exceeded estimated recoveries from abiotic $\text{H}_2$**

109 Electron recoveries revealed that this lake corrosive community does not rely on the abiotic  $\text{H}_2$  chemically  
110 generated at the  $\text{Fe}^0$  surface ( $2\text{e}^- + 2\text{H}^+ \rightarrow \text{H}_2$ ). As such, the community produced 3.3 times more methane ( $3.5$   
111  $\pm 0.1$  mM) than expected ( $1.1 \pm 0.2$  mM) from abiotic  $\text{H}_2$  (**Fig. 3**). Interestingly, within the community,  
112 methanogens started slowly ( $27 \pm 5.7$   $\mu\text{M}/\text{day}$ ), not rivaling highly productive acetogens ( $68 \pm 1.8$   $\mu\text{M}/\text{day}$ ) for  
113 the first month (**Fig. 3**). At the end of the incubation, acetogenesis ceased, whereas methanogens sped up  
114 accomplishing rates of methanogenesis ( $62.5 \pm 5.1$   $\mu\text{M}/\text{day}$ ), twofold above those predicted via acetoclastic  
115 methanogenesis ( $28 \pm 7.3$   $\mu\text{M}/\text{day}$ ):  $\text{CH}_3\text{COOH} \rightarrow \text{CO}_2 + \text{CH}_4$  (**Fig. 3**). Perhaps, methanogens were non-  
116 competitively accessing electrons from  $\text{Fe}^0$  in the absence of the acetogens, during the last month of incubation.  
117 To further address this, we verified the effectiveness of methanogenesis after the eradication of bacteria with  
118 the help of antibiotics. Bearing in mind that methanogens were as corrosive as the mixed community (**Fig. 2**),  
119 we anticipated this would translate in a highly productive methanogenic community once bacteria were  
120 rendered ineffective by antibiotics. To our surprise, methanogens unaccompanied by bacteria produced  
121 significantly less methane ( $1.3 \pm 0.1$  mM) than within the mixed community ( $3.5 \pm 0.1$  mM) (**Fig. 3**). On the  
122 other hand, acetogens accumulated significantly more acetate ( $2.5 \pm 0.05$  mM), than they did within the mixed  
123 community ( $2.0 \pm 0.03$  mM) (**Fig. 3**). However, the mixed community showed overall better electron recoveries  
124 than the summed electron recoveries of unaccompanied acetogens and methanogens put together (**Fig. 3**). We  
125 foresee three different scenarios to why the community was 15% more effective in utilizing  $\text{Fe}^0$  as electron  
126 donor than adding up the corrosive activities of solitary acetogens and solitary methanogens.

127 **First, the collapse of the acetogens may release useful enzymes for the methanogens.** During the last  
128 month of incubation, when the acetogenic population collapsed, we hypothesize that dying acetogens released  
129 enzymes (e.g. [FeFe]-hydrogenase), which boost H<sub>2</sub>-production and consequently H<sub>2</sub>-dependent  
130 methanogenesis. This supposition is backed by previous reports, which showed that acetogenic [FeFe]-  
131 hydrogenases in isolation reduce protons to hydrogen when provided with Fe<sup>0</sup> as electron donor (21-23).

132 **Secondly, the collapse of the acetogens results in methanogens co-feeding on Fe<sup>0</sup> and acetate.**  
133 Alternatively, when acetogens collapse, acetoclastic methanogens may start utilizing the Fe<sup>0</sup> directly, but can  
134 only do so after they were provided with enough acetate for biomass synthesis. This supposition is backed by  
135 reports that acetoclastic methanogens retrieve electrons from electrogenic bacteria directly or via conductive  
136 particles, while also requiring acetate for incorporation into biomass (25, 26). Moreover, many of the strict H<sub>2</sub>-  
137 utilizing methanogens, require or are stimulated by acetate (27, 28), likely because it alleviates the need to  
138 endogenously produce acetate for biomass synthesis.

139 **Thirdly, the collapse of the acetogens may lead to fixed N<sub>2</sub> accessible to methanogens corroding Fe<sup>0</sup>.**  
140 Methanogens were more effective after the collapse of the acetogenic community, and yet they did require the  
141 collapse of the acetogens to achieve the highest methanogenic rates. Some acetogens, including several  
142 *Clostridium* species, are effective N<sub>2</sub> fixers (29). N<sub>2</sub> fixation catalyzed by nitrogenase enzymes is an energy  
143 demanding process requiring 16 ATPs for one fixed N<sub>2</sub> (30, 31). We hypothesize that the collapse of the  
144 acetogens leads to significant release of fixed-dinitrogen, now easily accessible to the methanogens. This  
145 supposition was further supported by functional community analyses, which showed a high N<sub>2</sub> fixation  
146 capacity within the bacterial community but not the archaea (see below).

147 Thus, to better understand how acetogens and methanogens interact with each other inducing higher electron  
148 recoveries as a community than alone (**Fig. 3**), we examined the functional metagenome of a community  
149 residing on Fe<sup>0</sup> for four successive transfers.

## 150 **Acetogens**

151 *Clostridium* species (especially ‘Lachnoclostridium’ *saccharolyticum*) dominated the corrosive community  
152 (81.3% of all bacteria; 81.2% of all prokaryotes; **Fig. 4**) according to whole genome sequence analyses. Most  
153 *Clostridium* have never been tested for autotrophic acetogenesis including ‘*L.*’ *sachharolyticum* (32, 33).  
154 Nevertheless, we could find the entire Wood Ljungdahl pathway for acetogenesis in its readily available  
155 genome (NC\_014376.1). Using metagenome analyses we also reconstructed the Wood Ljungdahl pathway  
156 almost in its entirety for our corrosive-*Clostridium*, which carried acetogenesis from Fe<sup>0</sup> and CO<sub>2</sub> (**Fig. 5**).  
157 This acetogenic pathway has been intensively studied for biotechnological applications such as microbial

158 electrosynthesis, where electrodes are provided as electron donor instead of Fe<sup>0</sup> (34, 35). Our corrosive  
159 *Clostridium* was highly effective at generating acetate from Fe<sup>0</sup> at room temperature with rates (ca. 84 μM/day;  
160 **Fig. 3**) comparable to those observed for various acetogens incubated at higher temperatures on poised  
161 electrodes (36) or Fe<sup>0</sup> (5, 37). Moreover, *Clostridium* acetogens, often associated with corrosion, have been  
162 recently reported to corrode Fe<sup>0</sup> as effectively as sulfate reducers (38).

163 In our enrichments on Fe<sup>0</sup>, *Clostridium*-acetogens were faster than the methanogens, initiating and completing  
164 their activity two months before the methanogens (**Fig. 2**). Acetogens are faster not because the Wood-  
165 Ljungdahl pathway is more energy effective than methanogenesis, as acetogenesis generates less ATPs (0.3  
166 ATPs/acetate; (39)), than CO<sub>2</sub>-reductive methanogenesis (0.5 ATPs/methane; (40)). Instead, these *Clostridium*  
167 acetogens may be quicker at accessing electrons from Fe<sup>0</sup> because they contain [FeFe] proton-reducing  
168 hydrogenases, which are absent in methanogens (20). For example, the proton-reducing [FeFe] hydrogenases  
169 from *C. acetobutylicum* corrodes Fe<sup>0</sup> effectively by drawing electrons for the reaction: 2H<sup>+</sup> + 2e<sup>-</sup> → H<sub>2</sub> (21-  
170 23). *Clostridial* [FeFe] hydrogenases are operative at H<sup>+</sup>-reduction compared to methanogenic [NiFe]-  
171 hydrogenases which are rather operative in the opposite direction doing H<sub>2</sub>-oxidation, but less effective doing  
172 proton reduction (20). In the environmental metagenome of these lake-*Clostridia* we did find [FeFe]-  
173 hydrogenases (EC. 1.12.7.2 ferredoxin hydrogenase), indicating they have the genetic potential to effectively  
174 carry proton-reduction. However, we still do not understand the exact mechanism how this lake *Clostridium*  
175 establishes contact with Fe<sup>0</sup> for successful electron retrieval by the [FeFe]-hydrogenase enzymes.

176 One possibility is that they retrieve electrons (i) directly via membrane-bound proteins as it has been proposed  
177 for *Clostridium ljungdahlii* grown on electrodes (34, 35), or (ii) indirectly by exuding exocellular enzymes  
178 like hydrogenases or formate dehydrogenases for effective electron uptake for enzymatic H<sub>2</sub> production (17,  
179 21-23). However, if enzymes were exocellular they would deliver H<sub>2</sub> non-specifically for both the *Clostridium*-  
180 acetogens and hydrogenotrophic methanogens, resulting in competition for enzymatically-released H<sub>2</sub>. Then  
181 the microorganisms with highest affinity for H<sub>2</sub> would be favored. Generally, *Clostridium* species have a lower  
182 H<sub>2</sub>-threshold (minimum H<sub>2</sub>-concentration for growth) compared to most methanogens (41). Thus, if  
183 *Clostridium* releases enzymes extracellularly it would not benefit. We therefore propose that during the first  
184 phase *Clostridium* is most likely to directly retrieve electrons possibly using membrane bound [FeFe]-  
185 hydrogenases rather than expelling these enzymes extracellularly to be used by their competitors - the  
186 methanogens (**Fig. 6a**).

## 187 **Methanogens**

188 Methanogens were highly diverse comprising both acetoclastic *Methanosarcinales* (ca. 38% of all archaea;  
189 including 22% *Methanosarcina* and 16% *Methanosaeta*), as well as hydrogenotrophic groups – mostly

190 represented by *Methanothermobacter* (ca. 22% of all Archaea) (**Fig. 4**). *Methanothermobacter* species are  
191 rarely associated with corroded structures (42) and were shown to be especially corrosive when provided with  
192 a partner bacterium (43). On the other hand, *Methanosarcinales* have been often associated with corroded  
193 structures (4-9) were capable of utilizing Fe<sup>0</sup> as electron donor in pure cultures (12-14), but assumed to be  
194 indirectly involved in corrosion feeding on acetate delivered by acetogens (7, 8). Here we showed that  
195 methanogens alone could indeed corrode Fe<sup>0</sup> as effectively as a mixed community of acetogens and  
196 methanogens (**Fig. 2**).

197 During the acetogenic period (**Fig. 6**), when *Clostridium* proliferates on Fe<sup>0</sup> and produces acetate, we expected  
198 *Methanosarcinales* to feed on the acetate produced by *Clostridium*. Our data confirmed that during this period  
199 acetate explained all the methane produced. Accordingly, when acetogens collapsed, the rate of acetate  
200 consumption ( $40.1 \pm 6 \mu\text{M/day}$ ) surpassed that of methanogenesis ( $25.2 \pm 8 \mu\text{M/day}$ ) (**Fig. 3**) likely due to  
201 incorporation in the biomass of the methanogens. During this acetogenic period, the survival of  
202 hydrogenotrophic groups like *Methanothermobacter* may depend on retrieval of abiotic-H<sub>2</sub> as well as H<sub>2</sub>-  
203 produced by acetoclastic methanogens (44, 45).

204 During the methanogenic period (**Fig. 6**), when acetogens collapsed and methanogenic rates rose steeply from  
205 ca. 25  $\mu\text{M/day}$  to ca. 63  $\mu\text{M/day}$ , methanogens appear to take advantage of inactivated acetogens. Methanogens  
206 alone did not produce methane with the same rates (max. 17  $\mu\text{M/day}$ ) as they did together with acetogens (**Fig.**  
207 **3**). Thus, methanogens appear to require the preceding occurrence of the acetogens. We propose this is due to  
208 a combination of factors provided by ‘dying’ *Clostridia* such as: (i) leaked [FeFe]-proton reducing  
209 hydrogenases; (ii) available acetate for methanogenic biomass production; and (iii) readily fixed nitrogen. Our  
210 proposition was supported by metagenome analyses, which showed the presence of [FeFe]-ferredoxin  
211 hydrogenases in the acetogens, and an abundance of *Firmicutes*-nitrogenase genes (86% of the nifH, within  
212 the entire corrosive community), which were far less abundant in the metagenome of methanogens (0.2% nifH  
213 from *Methanosarcina*; 0.9% from *Methanosaeta*; and 1.6% in *Methanomicrobia*).

214 In conclusion, we describe here a novel form of interspecies interaction between acetogenic *Clostridia* and  
215 *Methanosarcinales*-methanogens during Fe<sup>0</sup> corrosion. We observed the interaction between acetogens and  
216 methanogens was not limited to acetate-transfer and required the collapse of the acetogens for an advantageous  
217 succession of the methanogens.

218 Thus, during Fe<sup>0</sup> corrosion, methanogenesis was stimulated by lysed co-occurring *Clostridium* and we provide  
219 support for three different scenarios: (i) the collapse of the acetogens releasing enzymes that boost  
220 methanogenesis, (ii) acetate contributing to increased biomass production and (iii) the collapse of the acetogens  
221 leading to more fixed N<sub>2</sub> accessible to the methanogens corroding Fe<sup>0</sup>. Moreover, when acetogens collapse,



222 methanogens don't have to compete anymore for electrons from Fe<sup>0</sup>. Thus, the interaction is a form of  
223 opportunistic scavenging with methanogens prospering due to the demise of the *Clostridium*.

## 224 MATERIALS AND METHODS

### 225 Sample collection and enrichment culture conditions

226 Sediment cores were sampled during the month of July 2016 from a small lake located near a construction site  
227 on the campus of the University of Southern Denmark (SDU), Odense (**Fig. 1**). The salinity of the lake was  
228 0.6 psu, and gas bubbles (including methane) were continuously released to the water surface while sampling.  
229 Sediment cores were sliced in the laboratory, and the depth horizon 15- 20 cm was used for downstream  
230 enrichments in a DSM modified 120 media (modifications: 0.6g/L NaCl, without casitone, without sodium  
231 acetate, without methanol, and without Na<sub>2</sub>S × 9H<sub>2</sub>O). The enrichment cultures were prepared in 50 mL blue  
232 butyl-rubber-stoppered glass vials with an anoxic headspace of a CO<sub>2</sub>: N<sub>2</sub> gas mix (20:80, v/v). Iron granules  
233 (99.98% Thermo Fisher, Germany) or iron coupons (3cm × 1cm × 1mm) were the only source of electrons  
234 over the course of five successive transfers. All incubations were performed in triplicate.

235 All enrichments were transferred when methane production reached stationary phase. DNA extractions, SEM  
236 analyses, and further experiments were performed at the fourth transfer, after 2 years of enrichment on Fe<sup>0</sup>. In  
237 addition, methanogen-specific coenzyme F<sub>420</sub> auto-fluorescence was monitored via routine microscopy to  
238 confirm the presence or absence of methanogens. To evaluate the solitary corrosive potential of methanogens,  
239 we blocked all bacteria with an antibiotic cocktail 200 µg/mL of kanamycin and 100 µg/mL of ampicillin as  
240 done before (46). To evaluate the solitary corrosive potential of the acetogens, we inhibited all methanogens  
241 with 2 mM 2-bromoethanesulfonate (BES) as done before (47).

### 242 Chemical analyses

243 Methane concentrations were analyzed on a Thermo Scientific Trace 1300 gas chromatograph system coupled  
244 to a thermal conductivity detector (TCD). The injector was operated at 150°C and the detector at 200°C with  
245 1.0 mL/min argon as reference gas. The oven temperature was constant at 70°C. Separation was done on a  
246 TG-BOND Msieve 5A column (Thermo Scientific; 30-m length, 0.53-mm i.d., and 20-µm film thickness) with  
247 argon as carrier gas at a flow of 25 mL/min. The GC was controlled and automated by a Chromeleon software  
248 (Dionex, Version 7). On our set-up the limit of detection for H<sub>2</sub> and CH<sub>4</sub> was 5 µM.

249 Acetate production was measured using the Dionex ICS-1500 Ion Chromatography System (ICS-1500)  
250 equipped with the AS50 autosampler, and an IonPac AS22 column coupled to a conductivity detector (31 mA).

251 For separation of volatile fatty acids, we used 4.5 mM Na<sub>2</sub>CO<sub>3</sub> with 1.4 mM NaHCO<sub>3</sub> as eluent. The run was  
252 isothermic at 30°C with a flow rate of 1.2mL/min. The limit of detection for acetate was 0.1 mM.

### 253 **DNA purification and metagenomic analyses**

254 DNA was isolated as previously described before (24), using a combination of two commercially available  
255 kits: MasterPure™ Complete DNA and RNA Purification Kit (Epicenter, Madison, Wi, USA), and the Fast  
256 Prep spin MP<sub>tm</sub> kit for soil (Mobio/Quiagen, Hildesheim, Germany). DNA quality was verified on an agarose  
257 gel, and DNA was quantified on a mySPEC spectrophotometer (VWR®/ Germany). Whole metagenome  
258 sequencing was performed on a NovaSeq 6000 system, using an Illumina TrueSeq PCR-free approach via a  
259 commercially available service (Macrogen/ Europe). Unassembled DNA sequences were merged, quality  
260 checked, and annotated using the Metagenomics Rapid Annotation (MG-RAST) server (v4.03) with default  
261 parameters (48). Illumina True Seq sequencing resulted in 3,723,388 high-quality reads of a total of 4,032,354  
262 with an average length of 250 bp. For taxonomic analyses, the metagenomic data was compared with the  
263 RefSeq (49) database available on the MG-RAST platform. Of a total of 2,664,384 OTUs, only 391 were not  
264 classified in a domain. The rarefaction curve indicated that most of the prokaryotic diversity was covered in  
265 our sample. To investigate genes involved in carbon and nitrogen fixation, sequencing reads were annotated  
266 against the KEGG Orthology (KO) reference database. Both taxonomic and functional analyses were  
267 performed with the following cutoff parameters: *e*-value of 1e<sup>-5</sup>, a minimum identity of 80%, and a maximum  
268 alignment length of 15 bp.

### 269 **Removal of corrosion crust and corrosion rates**

270 The corrosion crust from the iron coupons was removed with inactivated acid (10% hexamine in 2M HCl)  
271 (50). Then, the iron coupons were dried with N<sub>2</sub> gas stream, weighted and anaerobically stored.

### 272 **Scanning electron microscopy**

273 Fixation of cells on iron coupons was performed anaerobically by adding 2.5% glutaraldehyde in 0.1M  
274 phosphate buffer (pH 7.3) and incubating at 4°C for 12 h. The corroded coupons were then washed three times  
275 with 0.1 M phosphate buffer at 4°C for 10 min each. Dehydration was accomplished by a series of anoxic pure  
276 ethanol steps (each step 10 min; 35%, 50%, 70%, 80%, 90%, 95% and 100% v/v) (51). The coupons were  
277 chemical dried with hexamethyldisilazane under a gentle N<sub>2</sub> gas stream. Specimens were stored under N<sub>2</sub>  
278 atmosphere and analyzed within 18-24 h at the UMASS electron microscopy facility using the FEI Magellan  
279 400 XHR-SEM with a resolution of 5kV.

### 280 **ACKNOWLEDGMENTS**

281 This is a contribution to a Sapere Aude Danish Research Council grant to AER with grant number 4181-00203.  
282 We would like to thank Oona Snoeyenbos-West, Carolin Löscher, Satoshi Kawaichi and Christian Furbo  
283 Christiansen for help with sampling and valuable discussions. We would like to thank Joy Ward for help with  
284 preparing samples for scanning electron microscopy and we'd like to recognize the University of  
285 Massachusetts electron microscopy facility which provided access and training of PAPJ on the FEI Magellan  
286 XHR-SEM.

## 287 REFERENCES

- 288 1. Arriba-Rodriguez L-d, Villanueva-Balsera J, Ortega-Fernandez F, Rodriguez-Perez FJM.  
289 2018. Methods to Evaluate Corrosion in Buried Steel Structures: A Review. *Metals* 8:334.
- 290 2. Usher K, Kaksonen A, Cole I, Marney D. 2014. Critical review: microbially influenced  
291 corrosion of buried carbon steel pipes. *International Biodeterioration & Biodegradation*  
292 93:84-106.
- 293 3. Skovhus TL, Eckert RB, Rodrigues E. 2017. Management and control of microbiologically  
294 influenced corrosion (MIC) in the oil and gas industry—Overview and a North Sea case  
295 study. *Journal of biotechnology* 256:31-45.
- 296 4. Mand J, Park HS, Jack TR, Voordouw G. 2014. The role of acetogens in microbially  
297 influenced corrosion of steel. *Frontiers in Microbiology* 5.
- 298 5. Kato S, Yumoto I, Kamagata Y. 2015. Isolation of acetogenic bacteria that induce  
299 biocorrosion by utilizing metallic iron as the sole electron donor. *Applied and*  
300 *Environmental Microbiology* 81:67-73.
- 301 6. Mori K, Tsurumaru H, Harayama S. 2010. Iron corrosion activity of anaerobic hydrogen-  
302 consuming microorganisms isolated from oil facilities. *Journal of Bioscience and*  
303 *Bioengineering* 110:426-430.
- 304 7. Zhang T, Fang H, Ko B. 2003. Methanogen population in a marine biofilm corrosive to mild  
305 steel. *Applied Microbiology and Biotechnology* 63:101-106.
- 306 8. Mand J, Park HS, Okoro C, Lomans BP, Smith S, Chiejina L, Voordouw G. 2016.  
307 Microbial Methane Production Associated with Carbon Steel Corrosion in a Nigerian Oil  
308 Field. *Frontiers in Microbiology* 6.
- 309 9. Zhu XY, Lubeck J, Kilbane JJ. 2003. Characterization of microbial communities in gas  
310 industry pipelines. *Applied and Environmental Microbiology* 69:5354-5363.
- 311 10. Kotsyurbenko OR, Glagolev MV, Nozhevnikova AN, Conrad R. 2001. Competition  
312 between homoacetogenic bacteria and methanogenic archaea for hydrogen at low  
313 temperature. *FEMS Microbiology Ecology* 38:153-159.

- 314 11. Drake HL, Küsel K, Matthies C. 2002. Ecological consequences of the phylogenetic and  
315 physiological diversities of acetogens. *Antonie Van Leeuwenhoek* 81:203-213.
- 316 12. Daniels L, Belay N, Rajagopal BS, Weimer PJ. 1987. Bacterial methanogenesis and growth  
317 from CO<sub>2</sub> with elemental iron as the sole source of electrons. *Science* 237:509-511.
- 318 13. Boopathy R, Daniels L. 1991. Effect of pH on anaerobic mild steel corrosion by  
319 methanogenic bacteria. *Applied and Environmental Microbiology* 57:2104-2108.
- 320 14. Belay N, Daniels L. 1990. Elemental metals as electron sources for biological methane  
321 formation from CO<sub>2</sub>. *Antonie van Leeuwenhoek* 57:1-7.
- 322 15. Dinh HT, Kuever J, Mußmann M, Hassel AW, Stratmann M, Widdel F. 2004. Iron  
323 corrosion by novel anaerobic microorganisms. *Nature* 427:829.
- 324 16. Lorowitz WH, Nagle Jr DP, Tanner R. 1992. Anaerobic oxidation of elemental metals  
325 coupled to methanogenesis by *Methanobacterium thermoautotrophicum*. *Environmental*  
326 *science and technology* 26:1606-1610.
- 327 17. Deutzmann JS, Sahin M, Spormann A. 2015. Extracellular enzymes facilitate electron  
328 uptake in biocorrosion and bioelectrosynthesis. *mBio* 6:e00496-15.
- 329 18. Beese-Vasbender PF, Grote J-P, Garrelfs J, Stratmann M, Mayrhofer KJ. 2015. Selective  
330 microbial electrosynthesis of methane by a pure culture of a marine lithoautotrophic  
331 archaeon. *Bioelectrochemistry* 102:50-55.
- 332 19. Tsurumaru H, Ito N, Mori K, Wakai S, Uchiyama T, Iino T, Hosoyama A, Ataku H,  
333 Nishijima K, Mise M. 2018. An extracellular [NiFe] hydrogenase mediating iron corrosion  
334 is encoded in a genetically unstable genomic island in *Methanococcus maripaludis*.  
335 *Scientific Reports* 8:15149.
- 336 20. Peters JW, Schut GJ, Boyd ES, Mulder DW, Shepard EM, Broderick JB, King PW, Adams  
337 M. 2015. [FeFe]- and [NiFe]-hydrogenase diversity, mechanism, and maturation. *Biochimica*  
338 *et Biophysica Acta* 1853:1350-1369.
- 339 21. Mehanna M, Basseguy R, Delia M-L, Girbal L, Demuez M, Bergel A. 2008. New  
340 hypotheses for hydrogenase implication in the corrosion of mild steel. *Electrochimica Acta*  
341 54:140-147.
- 342 22. Rouvre I, Basseguy R. 2016. Exacerbation of the mild steel corrosion process by direct  
343 electron transfer between [Fe-Fe]-hydrogenase and material surface. *Corrosion Science*  
344 111:199-211.
- 345 23. Mehanna M, Rouvre I, Delia M-L, Féron D, Bergel A, Basséguy R. 2016. Discerning  
346 different and opposite effects of hydrogenase on the corrosion of mild steel in the presence  
347 of phosphate species. *Bioelectrochemistry* 111:31-40.

- 348 24. Jaramillo PAP, Snoeyenbos-West O, Loescher C, Thamdrup B, Rotaru A-E. 2019. Baltic  
349 Methanosarcina and Clostridium compete for electrons from metallic iron. Biorxiv  
350 530386:530386.
- 351 25. Rotaru A-E, Shrestha PM, Liu F, Markovaite B, Chen S, Nevin KP, Lovley DR. 2014.  
352 Direct interspecies electron transfer between *Geobacter metallireducens* and *Methanosarcina*  
353 *barkeri*. *Applied and Environmental Microbiology* 80:4599-4605.
- 354 26. Rotaru A-E, Shrestha PM, Liu F, Shrestha M, Shrestha D, Embree M, Zengler K, Wardman  
355 C, Nevin KP, Lovley DR. 2014. A new model for electron flow during anaerobic digestion:  
356 direct interspecies electron transfer to *Methanosaeta* for the reduction of carbon dioxide to  
357 methane. *Energy and Environmental Science* 7:408-415.
- 358 27. Jetten MS, Stams AJ, Zehnder A. 1990. Acetate threshold values and acetate activating  
359 enzymes in methanogenic bacteria. *FEMS Microbiology Ecology* 6:339-344.
- 360 28. Whitman WB, Bowen TL, Boone DR. 2014. The Methanogenic Bacteria, p 123-163. *In*  
361 Rosenberg E, DeLong EF, Lory S, Stackebrandt E, Thompson F (ed), *The Prokaryotes:*  
362 *Other Major Lineages of Bacteria and The Archaea* doi:10.1007/978-3-642-38954-2\_407.  
363 Springer Berlin Heidelberg, Berlin, Heidelberg.
- 364 29. Chen J-S. 2004. Nitrogen fixation in the Clostridia, p 53-64, *Genetics and regulation of*  
365 *nitrogen fixation in free-living bacteria*. Springer.
- 366 30. Raymond J, Siefert JL, Staples CR, Blankenship R. 2004. The natural history of nitrogen  
367 fixation. *Molecular biology and evolution* 21:541-554.
- 368 31. Simpson FB, Burris R. 1984. A nitrogen pressure of 50 atmospheres does not prevent  
369 evolution of hydrogen by nitrogenase. *Science* 224:1095-1097.
- 370 32. Murray W, Khan A. 1982. *Clostridium saccharolyticum* sp. nov., a saccharolytic species  
371 from sewage sludge. *International Journal of Systematic and Evolutionary Microbiology*  
372 32:132-135.
- 373 33. Hosny M, Abdallah RA, Khalil JB, Fontanini A, Baptiste E, Armstrong N, La Scola B.  
374 2019. *Clostridium pacaense*: a new species within the genus *Clostridium*. *New Microbes*  
375 *and New Infections* 28:6-10.
- 376 34. Nevin KP, Hensley SA, Franks AE, Summers ZM, Ou J, Woodard TL, Snoeyenbos-West  
377 OL, Lovley DR. 2011. Electrosynthesis of organic compounds from carbon dioxide is  
378 catalyzed by a diversity of acetogenic microorganisms. *Applied and Environmental*  
379 *Microbiology* 77:2882-2886.
- 380 35. Nevin KP, Woodard TL, Franks AE, Summers ZM, Lovley DR. 2010. Microbial  
381 electrosynthesis: feeding microbes electricity to convert carbon dioxide and water to  
382 multicarbon extracellular organic compounds. *mBio* 1:e00103-10.

- 383 36. Faraghiparapari N, Zengler K. 2017. Production of organics from CO<sub>2</sub> by microbial  
384 electrosynthesis (MES) at high temperature. *Journal of Chemical Technology and*  
385 *Biotechnology* 92:375-381.
- 386 37. Philips J, Monballyu E, Georg S, De Paepe K, PrévotEAU A, Rabaey K, Arends JB. 2018. An  
387 *Acetobacterium* strain isolated with metallic iron as electron donor enhances iron corrosion  
388 by a similar mechanism as *Sporomusa sphaeroides*. *FEMS microbiology ecology* 95:fiy222.
- 389 38. Eid MM, Duncan KE, Tanner RS. 2018. A semi-continuous system for monitoring  
390 microbially influenced corrosion. *Journal of microbiological methods* 150:55-60.
- 391 39. Müller V, Chowdhury NP, Basen M. 2018. Electron bifurcation: A long-hidden energy-  
392 coupling mechanism. *Annual Review of Microbiology* 72:331-353.
- 393 40. Schlegel K, Müller V. 2013. Evolution of Na<sup>+</sup> and H<sup>+</sup> bioenergetics in methanogenic  
394 archaea. *Biochemical Society Transactions* 41:421-426.
- 395 41. Drake HL, Küsel K, Matthies C. 2006. Acetogenic Prokaryotes, p 354-420. *In* Dworkin M,  
396 Falkow S, Rosenberg E, Schleifer K-H, Stackebrandt E (ed), *The Prokaryotes: Volume 2:*  
397 *Ecophysiology and Biochemistry* doi:10.1007/0-387-30742-7\_13. Springer New York, New  
398 York, NY.
- 399 42. Usher K, Kaksonen A, MacLeod I. 2014. Marine rust tubercles harbour iron corroding  
400 archaea and sulphate reducing bacteria. *Corrosion Science* 83:189-197.
- 401 43. Islam S, Karr EA. 2013. Examination of metal corrosion by *Desulfomicrobium*  
402 *thermophilum*, *Archaeoglobus fulgidus*, and *Methanothermobacter thermautotrophicus*. *Bio*  
403 *One* 84:59-65.
- 404 44. Phelps T, Conrad R, Zeikus J. 1985. Sulfate-dependent interspecies H<sub>2</sub> transfer between  
405 *Methanosarcina barkeri* and *Desulfovibrio vulgaris* during coculture metabolism of acetate  
406 or methanol. *Applied and Environmental Microbiology* 50:589-594.
- 407 45. Ozuolmez D, Na H, Lever MA, Kjeldsen KU, Jørgensen BB, Plugge CM. 2015.  
408 Methanogenic archaea and sulfate reducing bacteria co-cultured on acetate: teamwork or  
409 coexistence? *Frontiers in microbiology* 6:492.
- 410 46. Cheng L, Dai L, Li X, Zhang H, Lu Y. 2011. Isolation and characterization of  
411 *Methanothermobacter crinale* sp. nov., a novel hydrogenotrophic methanogen from the  
412 Shengli oil field. *Applied and Environmental Microbiology* 77:5212-5219.
- 413 47. Zhou Z, Meng Q, Yu Z. 2011. Effects of methanogenic inhibitors on methane production  
414 and abundances of methanogens and cellulolytic bacteria in in vitro ruminal cultures.  
415 *Applied and Environmental Microbiology* 77:2634-2639.
- 416 48. Meyer F, Paarmann D, D'Souza M, Olson R, Glass EM, Kubal M, Paczian T, Rodriguez A,  
417 Stevens R, Wilke A. 2008. The metagenomics RAST server—a public resource for the

- 418 automatic phylogenetic and functional analysis of metagenomes. BMC bioinformatics  
419 9:386.
- 420 49. Tatusova T, Ciufu S, Federhen S, Fedorov B, McVeigh R, O'Neill K, Tolstoy I, Zaslavsky L.  
421 2014. Update on RefSeq microbial genomes resources. Nucleic acids research 43:D599-  
422 D605.
- 423 50. Enning D, Garrelfs J. 2014. Corrosion of iron by sulfate-reducing bacteria: new views of an  
424 old problem. Applied and Environmental Microbiology 80:1226-1236.
- 425 51. Araujo JC, Téran FC, Oliveira RA, Nour EA, Montenegro MA, Campos JR, Vazoller RF.  
426 2003. Comparison of hexamethyldisilazane and critical point drying treatments for SEM  
427 analysis of anaerobic biofilms and granular sludge. Journal of electron microscopy 52:429-  
428 433.
- 429

430 **Figures**

431 **Fig. 1.** The sampling site located in an urban construction area on the island of Fyn, Denmark (upper panel)  
432 is a small lake near the university of Southern Denmark (lower panel). Anoxic lake sediment was  
433 sampled with push cores during the summer of 2017, when ebullition due to increased  
434 methanogenesis is commonly observed.

**Fig. 1**

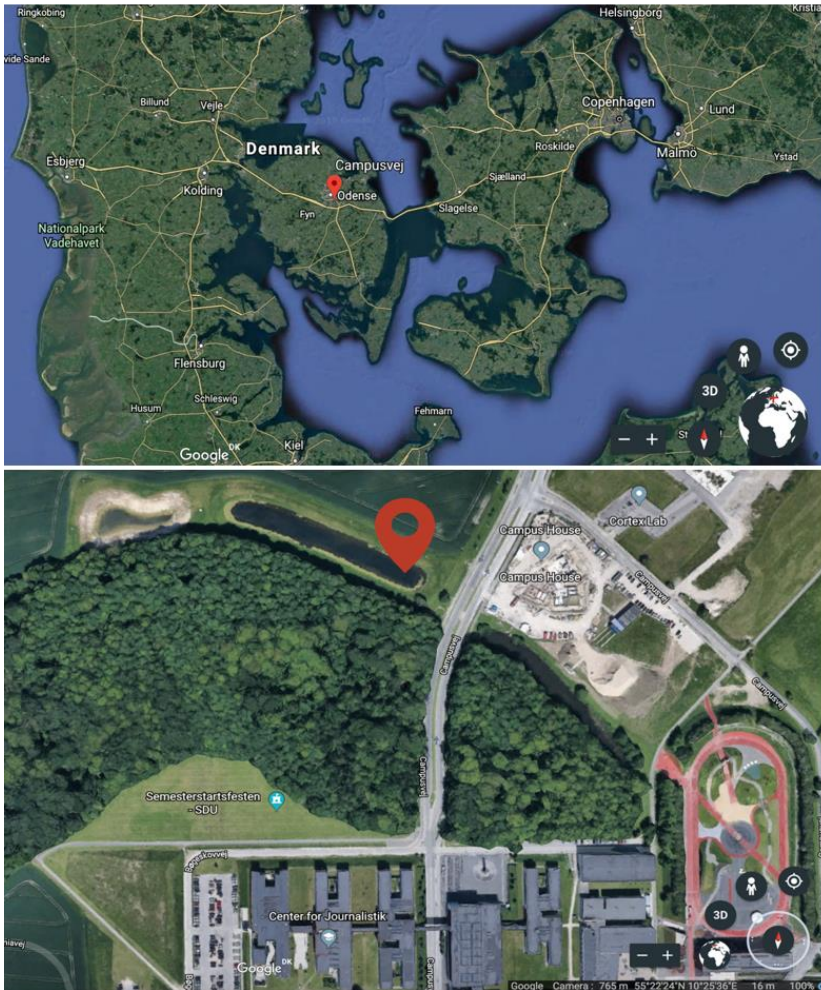

435



436 **Fig. 2.** Corrosion of Fe<sup>0</sup> by a microbial community (4<sup>th</sup> successive transfer on Fe<sup>0</sup>) as determined by weight  
437 loss determination (a). Inhibition experiments revealed that acetogens were more corrosive than the  
438 mixed community, whereas methanogens were as corrosive alone as within the mixed community (a).  
439 (b) Visual observations of the Fe<sup>0</sup>-surface after exposure to a corrosive community for 5 months  
440 Removal of the black crust revealed changes in surface roughness. (c) Scanning electron microscopy  
441 of a mixed community after 5 months of incubation reveals cells are attached to the Fe<sup>0</sup>-surface.  
442

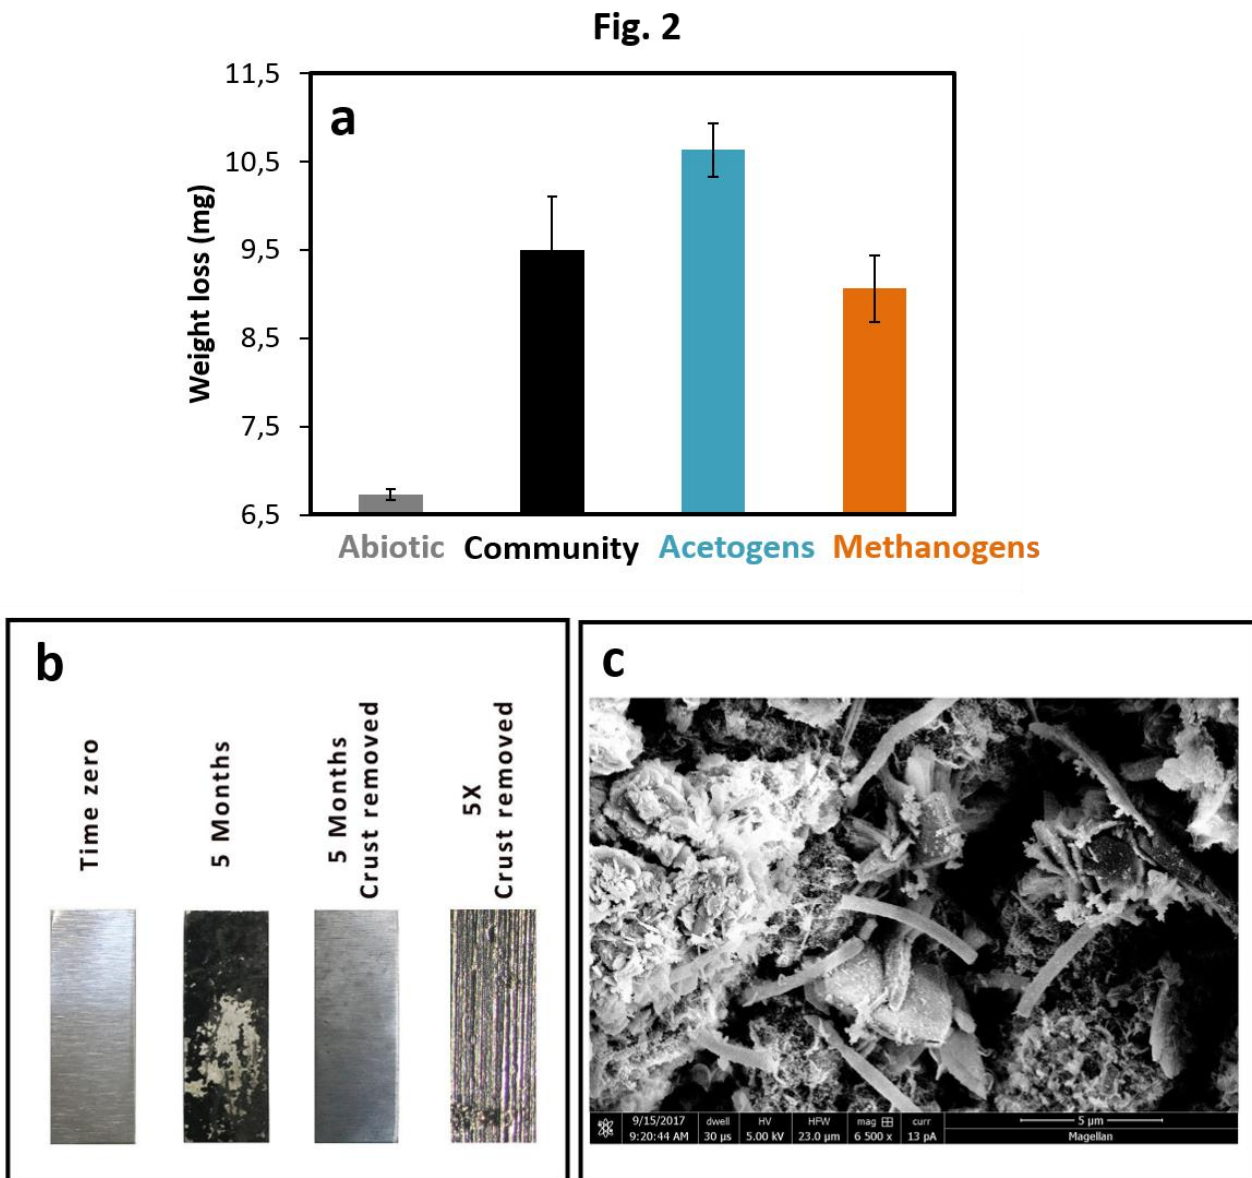

443

444

445 **Fig. 3.** Product formation using Fe<sup>0</sup> as sole electron donor. (a) An abiotic control which includes Fe<sup>0</sup>  
 446 exposed to the culture medium containing bicarbonate, will build up H<sub>2</sub> in the absence of cells. From  
 447 abiotic H<sub>2</sub> microorganisms could use four mols H<sub>2</sub> to produce a mol of products (acetate or methane)  
 448 according to reactions 3 and 4. (b) A mixed community after four successive transfers solely with Fe<sup>0</sup>  
 449 as electron donor, generated successively acetate with very high rates and later methane with  
 450 similarly high rates. The products generated could not be explained solely by abiotic-H<sub>2</sub> (c)  
 451 Acetogens were even more effective alone during the first month of incubation. The amount of  
 452 acetate they produced could not be explained by abiotic-H<sub>2</sub>. (d) Methanogens alone although as  
 453 corrosive as the mixed community, they were not as effective at producing methane as they were  
 454 within the mixed community. (e) Total products as mM electron equivalents (eeq) produced on Fe<sup>0</sup>  
 455 under four different conditions. The following values are considered for each product: 2 mM eeq per  
 456 mol H<sub>2</sub>, 8 mM eeq for each mol of methane or acetate (see reactions 3 and 4). All experiments are  
 457 run in triplicates (n=3). When error bars are not shown they were smaller than the symbols.

**Fig. 3**

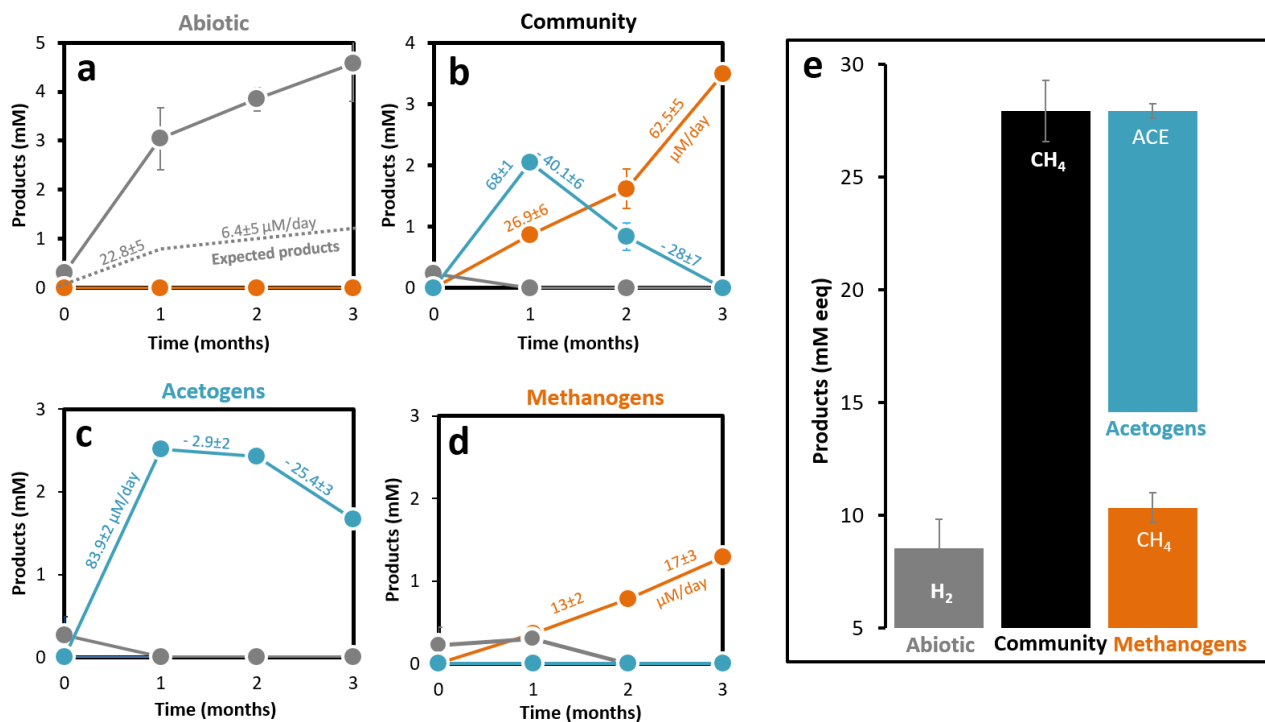

458

459

460 **Fig. 4.** Whole genome sequence distribution for (a) bacterial and (b) archaeal genera representing a corrosive  
461 community enriched on Fe<sup>0</sup> after four subsequent transfers.

**Fig. 4**

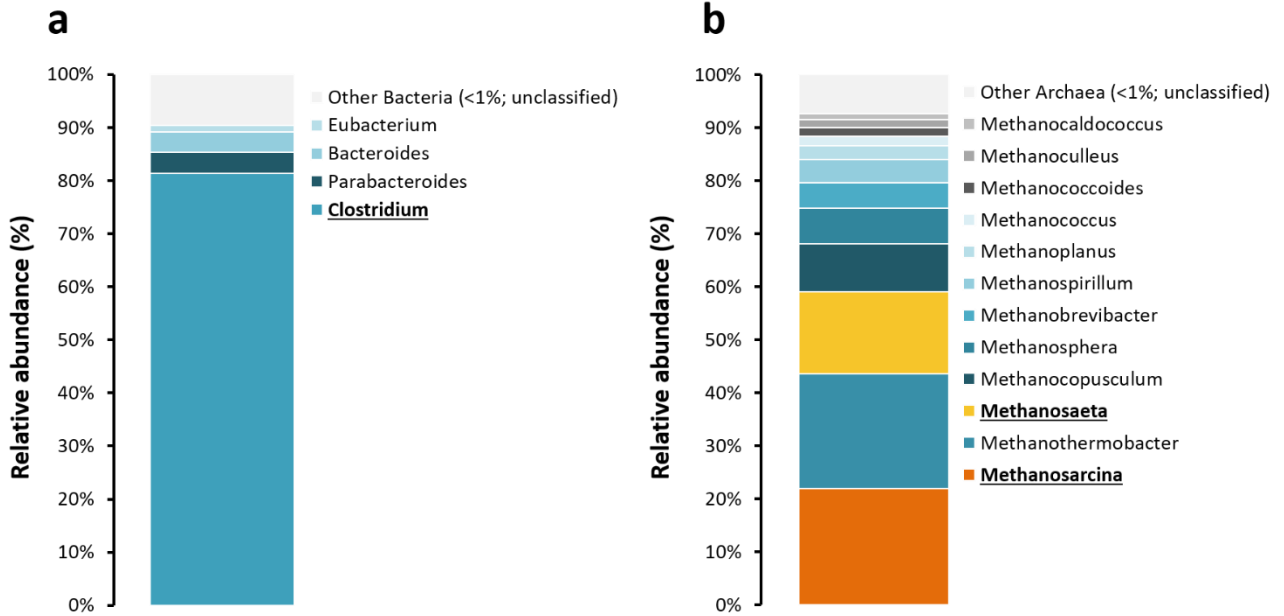

462

463 **Fig. 5.** Representative enzymes of the Wood-Ljungdahl pathway discovered in the metagenome of *Clostridia*  
 464 from an Fe<sup>0</sup>-corrosive community enriched from an urban lake. The numbers are shown in red. ND  
 465 means not detected.

**Fig. 5**

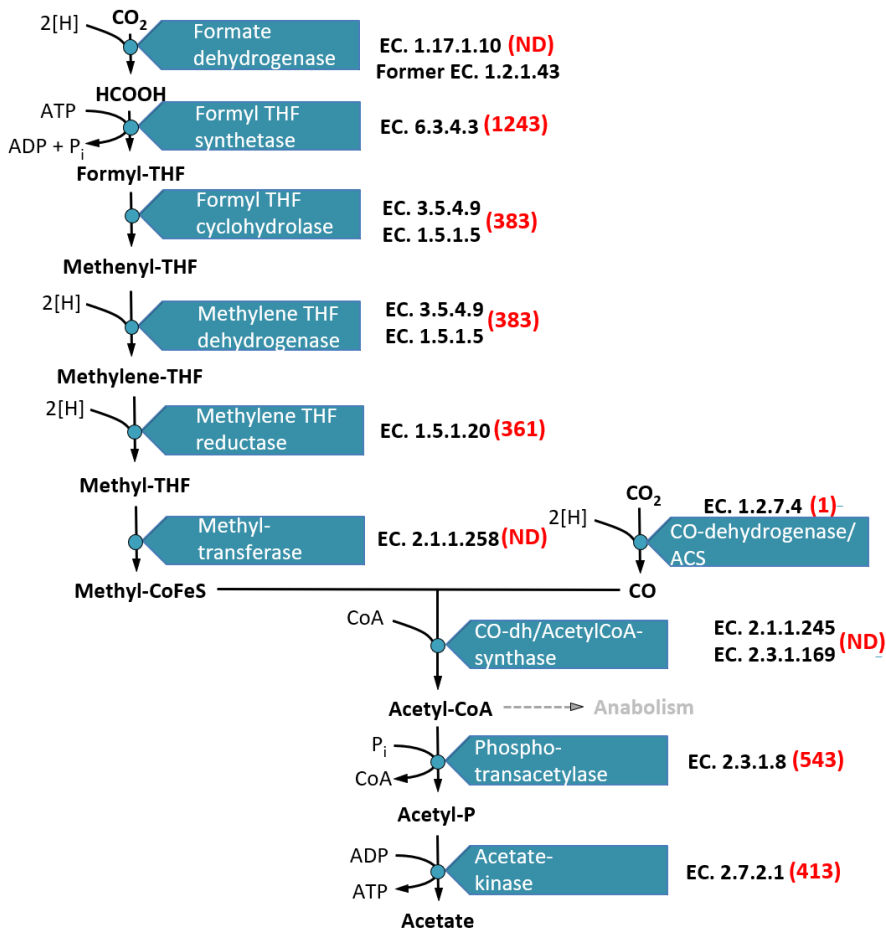

466

467 **Fig. 6.** Modeled interactions between *Clostridium*-acetogens with acetoclastic *Methanosarcinales* and  
468 hydrogenotrophic methanogens during the acetogenic phase when acetate production was highest (a)  
469 and (b) during the methanogenesis phase when methane production was highest.

**Fig. 6**

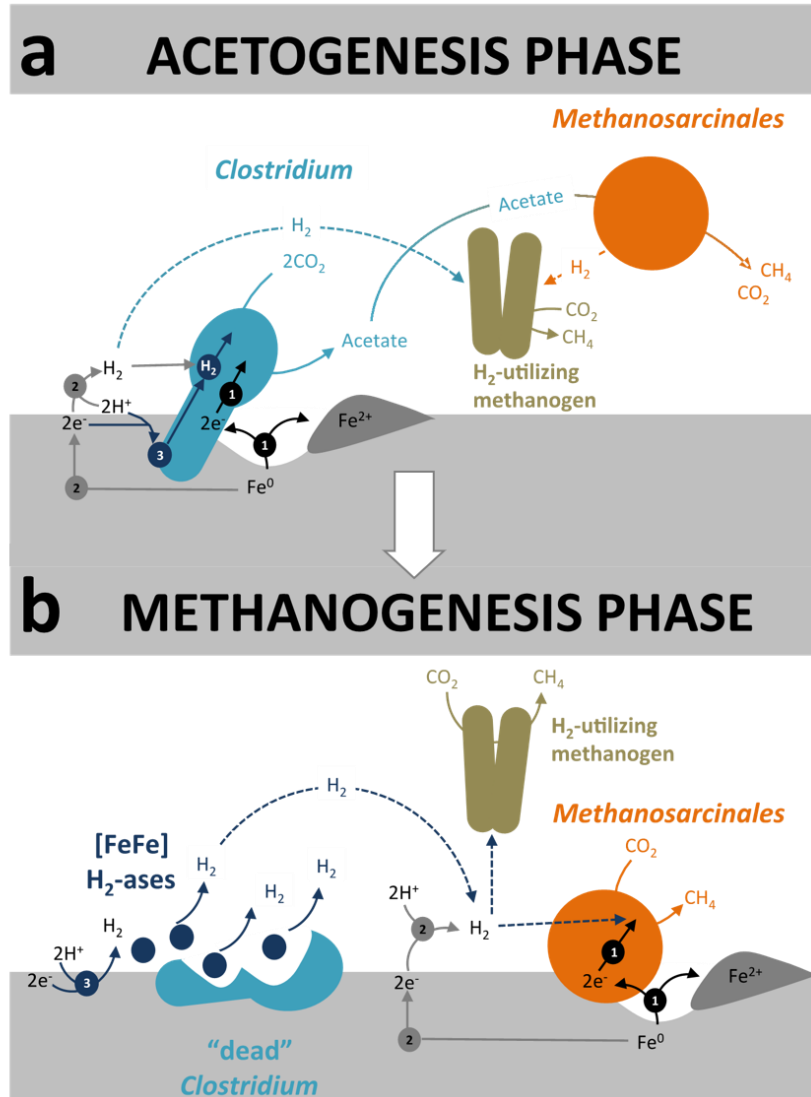

470
